# Supplementary material for: Porous gold nanoparticle/graphene oxide composite as efficient catalysts for reduction of 4-nitrophenol
Source: Royal Society of Chemistry journal article supplement (doi:10.1039/c6ra01772j), 2016-01-01
Supplement: c6ra01772j1.pdf [file c6ra01772j1.pdf]

## Porous gold nanoparticle/graphene oxide composite as efficient catalysts for reduction of 4-nitrophenol

Mengmeng Zhang, Xuan Lu, Hao-Yi Wang, Xiaoli Liu, Yujun Qin,\* Pu Zhang, Zhi-Xin Guo

Department of Chemistry, Renmin University of China, Beijing 100872, China.

Email: yjqin@ruc.edu.cn.

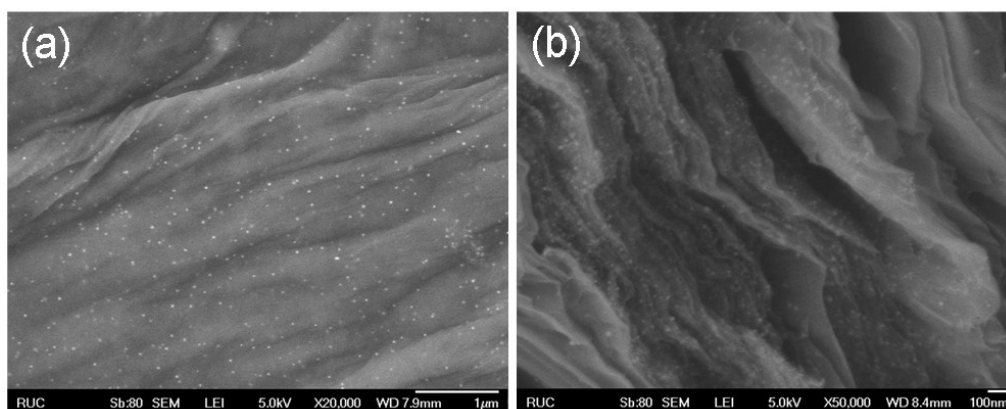

**Fig. S1** Top view (a) and cross-section (b) SEM images of Au/PEI/GO composite film prepared from vacuum-filtering.

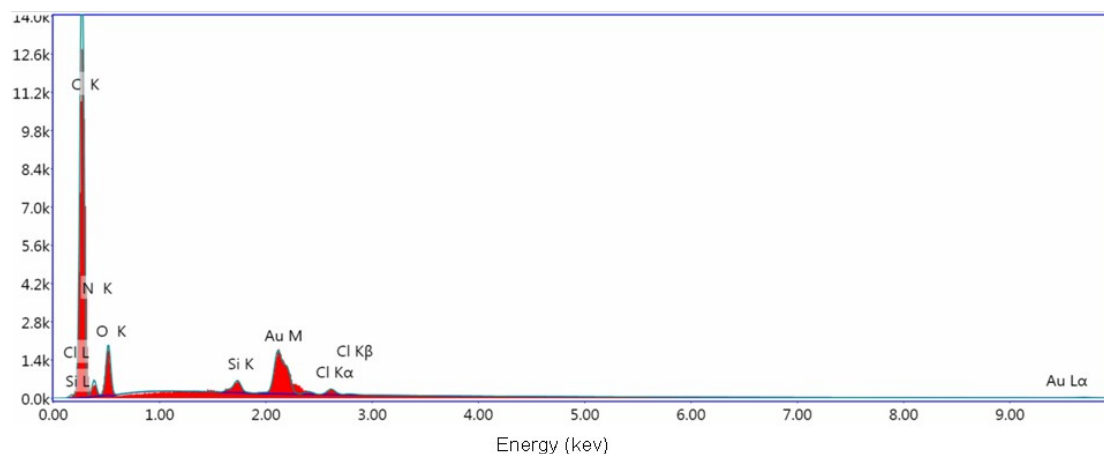

**Fig. S2** SEM-EDX analysis of Au/PEI/GO composites from freeze-drying.

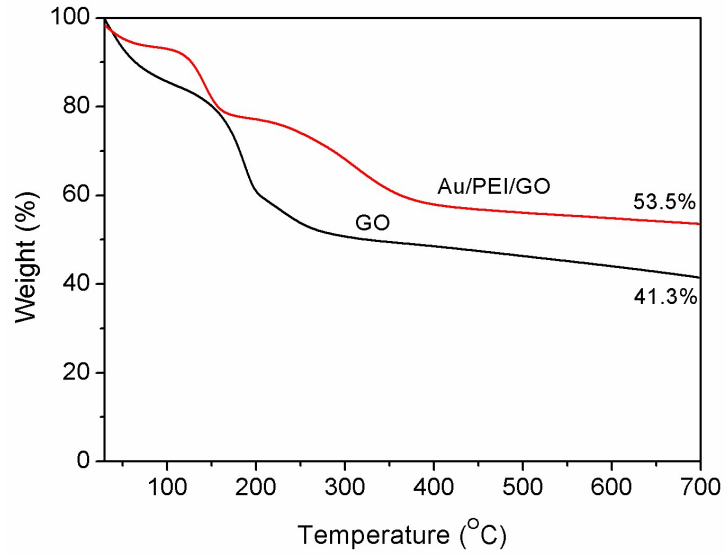

**Fig. S3** TGA curves of porous Au/PEI/GO composite and GO, with the final weight of 53.5% and 41.3%, respectively, at 700 °C.

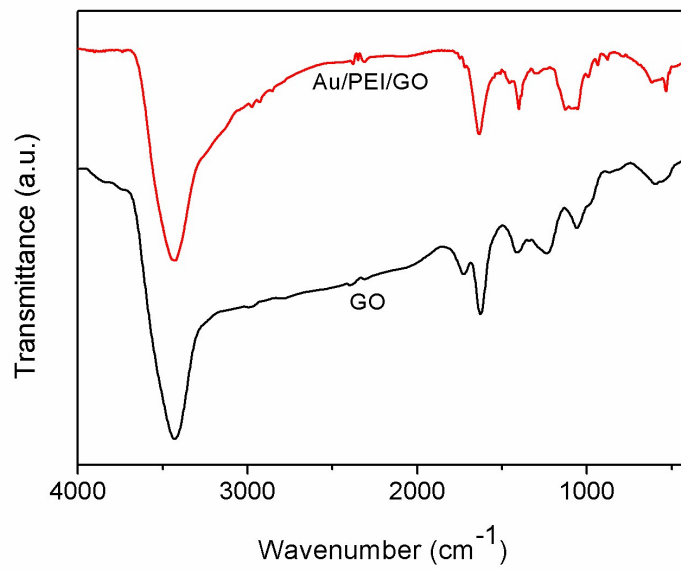

**Fig. S4** FT-IR spectra of porous Au/PEI/GO composite and GO.

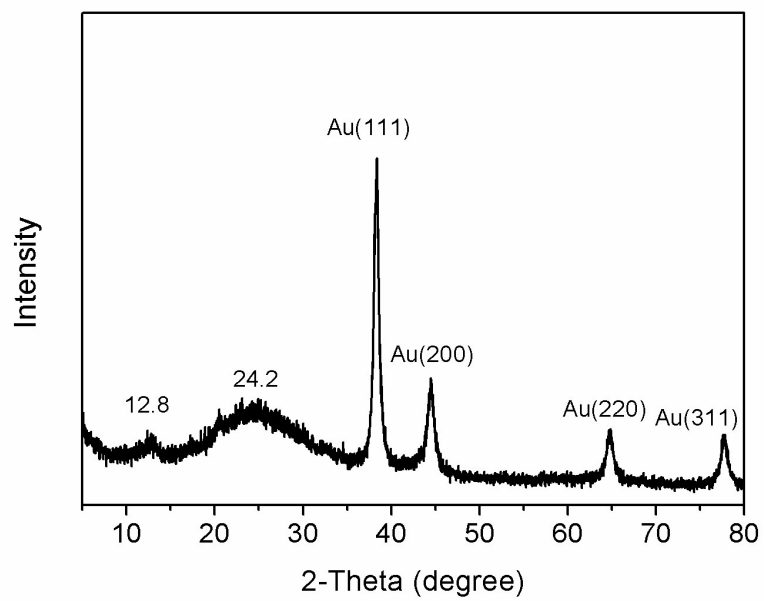

**Fig. S5** XRD pattern of Au/PEI/GO composite film prepared from vacuum-filtering.
